# Supplementary material
Source: HighWire-hosted journal article supplement (https://le.uwpress.org/highwire/filestream/2920/field_highwire_adjunct_files/3/LE-96-4-08-Parthum-appD.pdf)
Supplement: LE-96-4-08-Parthum-appD.pdf [file LE-96-4-08-Parthum-appD.pdf]

## Appendix D: Additional Figures

Figure D1: Responses to Questions about Recreation

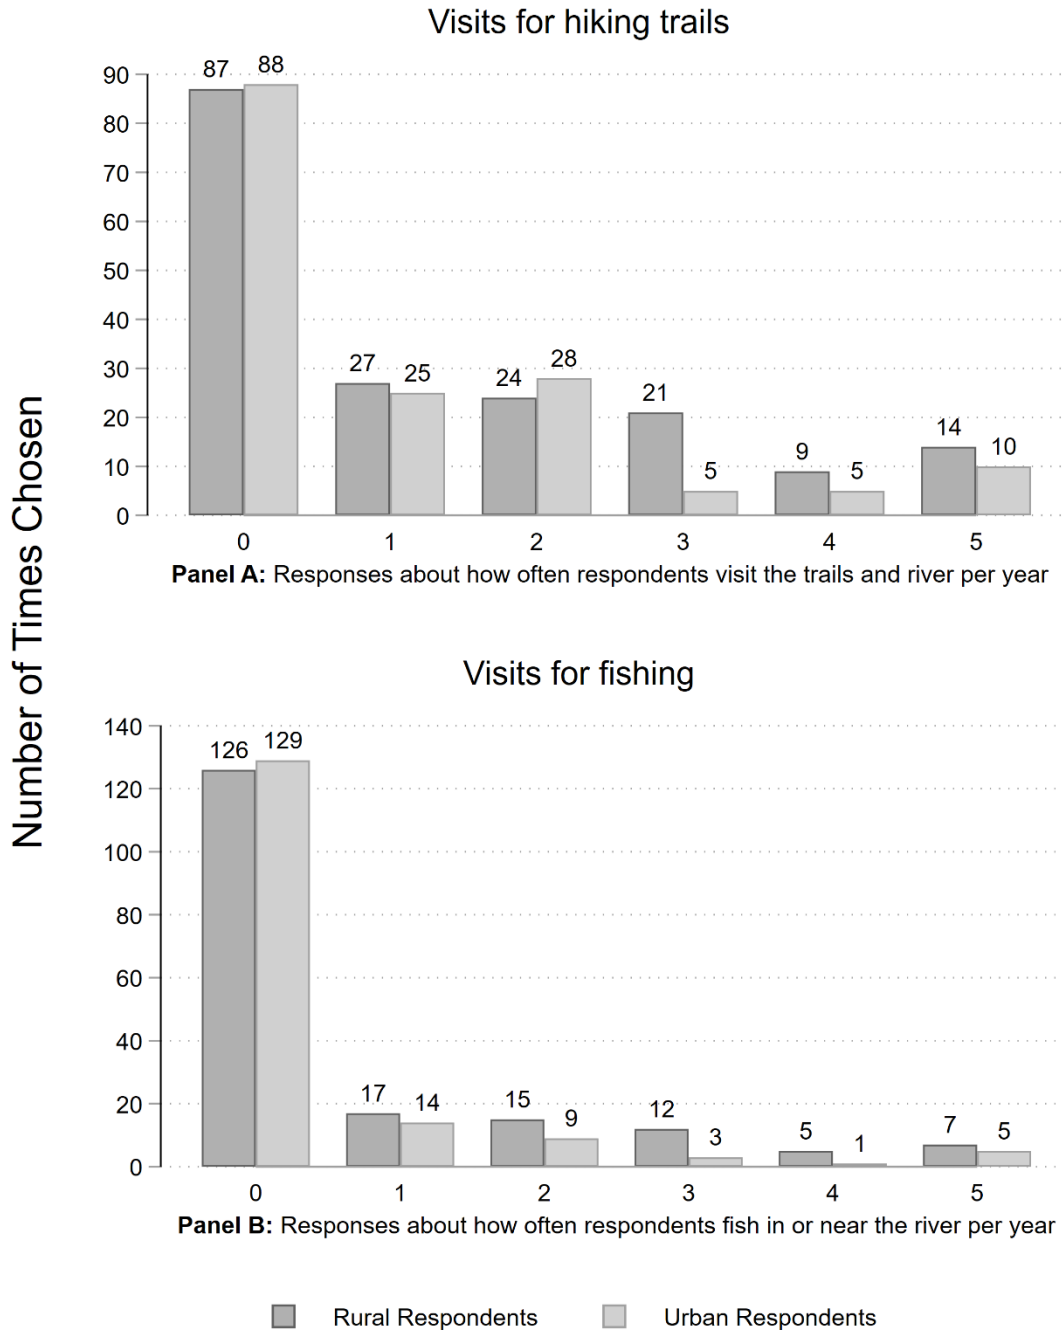

**Note:** Responses to the post-survey questionnaire about how frequently respondents visit the trails around the Upper Sangamon River each year, and if they participate in recreational fishing. Respondents rarely visit the trails, and even more rarely fish in the river or nearby water.

**Figure D2: Demographics and characteristics plots of the USRB**

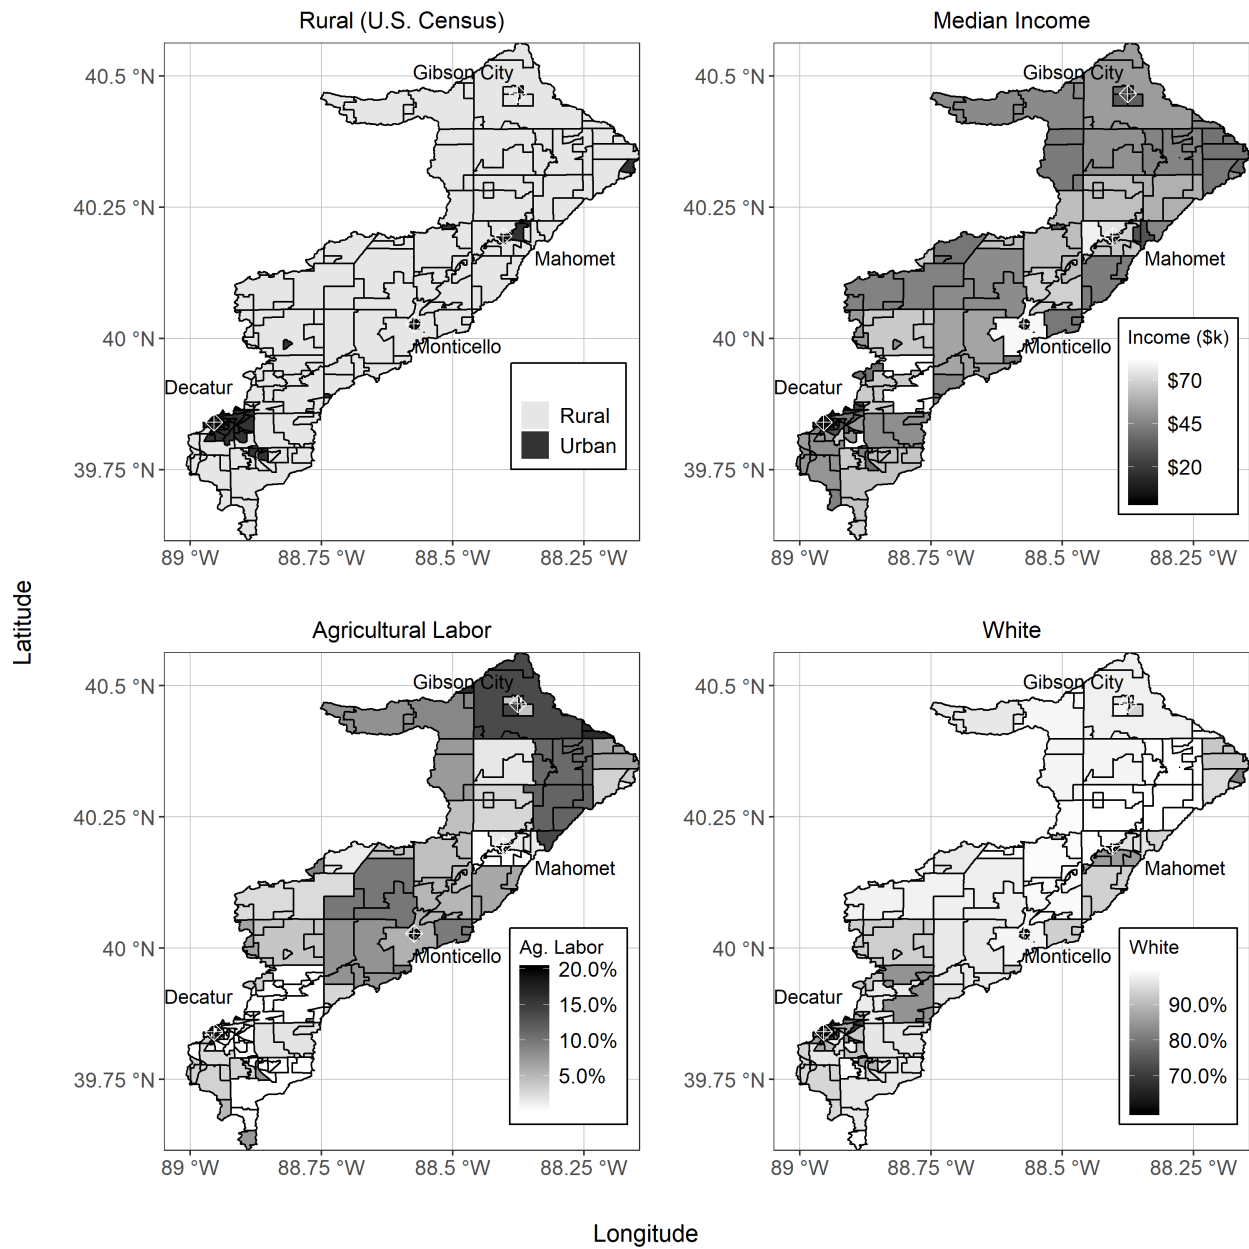

**Note:** Data from the American Community Survey (U.S.Census 2019) are plotted within the watershed. Comparisons between these data and our sample are found in Table B2.

**Figure D3: Conditional Individual-Specific Means of MWTP**

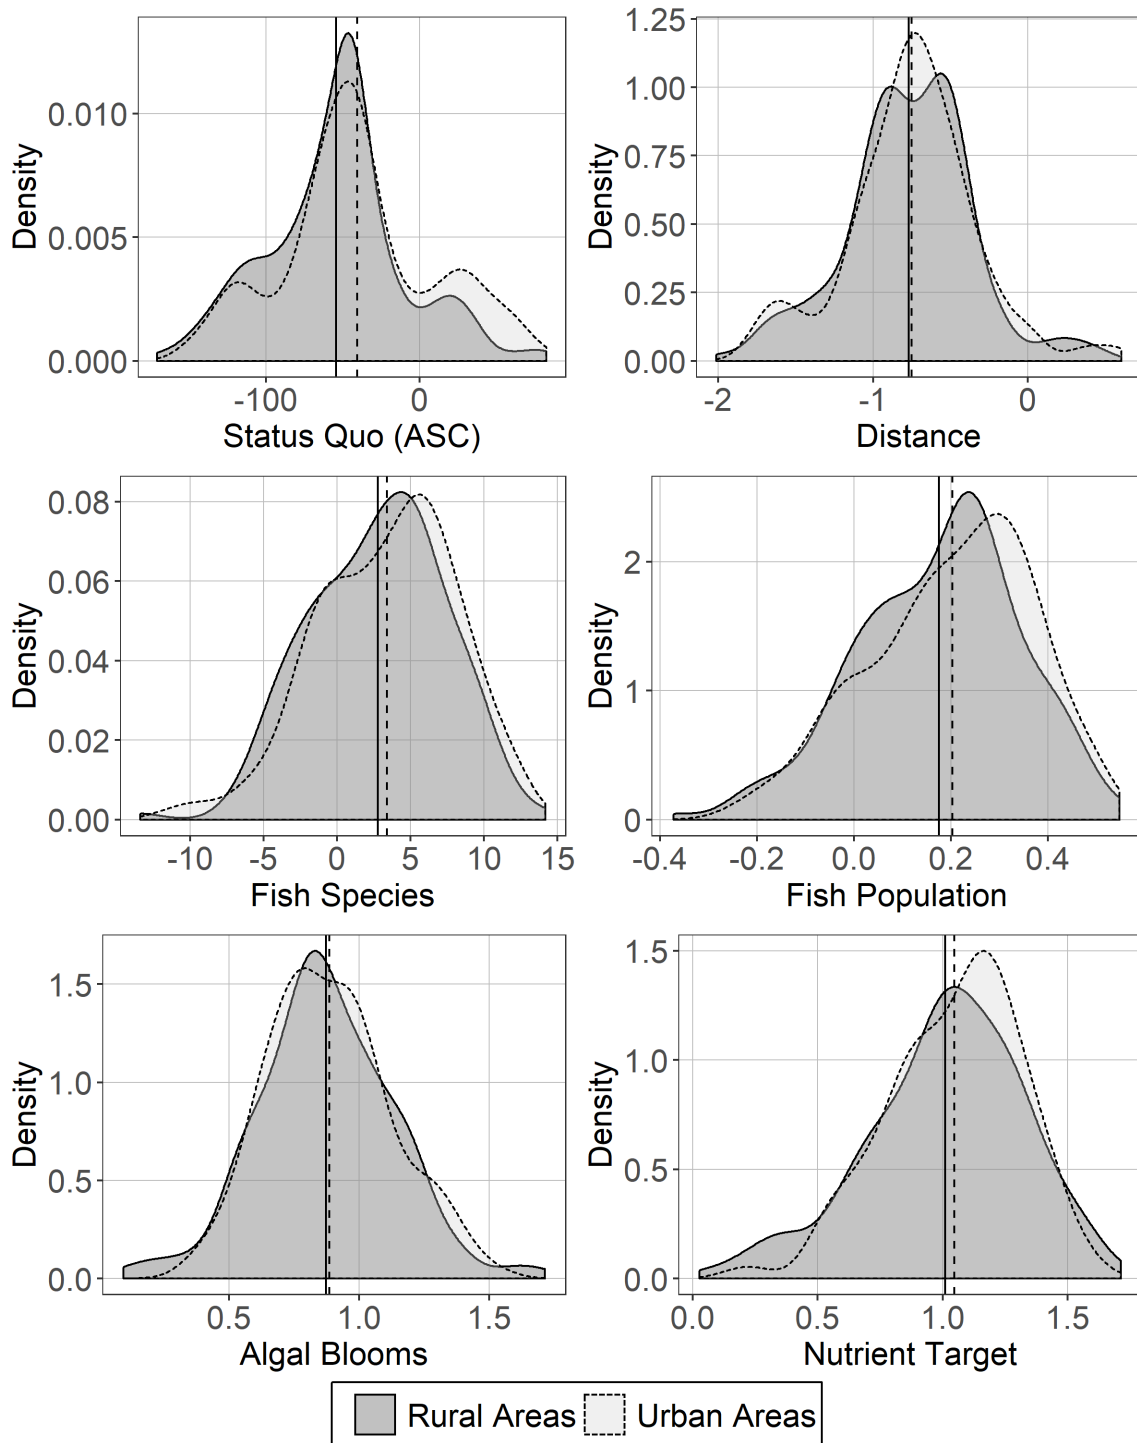

**Note:** Conditional individual-specific means of MWTP are derived using the *gmnl* package in R (Sarrias and Daziano 2017). These values are used in the IAM exercise to estimate the spatial distribution of benefits within the watershed.

## References

- Sarrias, Mauricio, and Ricardo Daziano. 2017. "Multinomial Logit Models with Continuous and Discrete Individual Heterogeneity in R: The gmnI Package." *Journal of Statistical Software*, Articles 79: 1-46. doi:10.18637/jss.v079.i02.
- U.S.Census. 2019. "2013-2017 American Community Survey (ACS) 5-year estimates." U.S. Census Bureau, 6.
